# Supplementary material for: Complementarity of two proteomic data analysis tools in the identification of drug-metabolising enzymes and transporters in human liver
Source: Royal Society of Chemistry journal article supplement (doi:10.1039/d3mo00144j), 2023-11-13
Supplement: d3mo00144j1.pdf [file d3mo00144j1.pdf]

## Supporting Information

### **Complementarity of two Proteomic Data Analysis Tools in the Identification of Drug-Metabolising Enzymes and Transporters in Human Liver**

Areti-Maria Vasilogianni<sup>1,\*</sup>, Sarah Alrubia<sup>1,2,\*</sup>, Eman El-Khateeb<sup>1,3,\*</sup>, Zubida M. Al-  
Majdoub<sup>1</sup>, Narciso Couto<sup>1</sup>, Brahim Achour<sup>1,4</sup>, Amin Rostami-Hodjegan<sup>1,5</sup>, Jill Barber<sup>1†</sup>

<sup>1</sup> Centre for Applied Pharmacokinetic Research, University of Manchester, Manchester, UK.

<sup>2</sup> Pharmaceutical Chemistry Department, College of Pharmacy, King Saud University,  
Riyadh, Saudi Arabia.

<sup>3</sup> Clinical Pharmacy Department, Faculty of Pharmacy, Tanta University, Tanta, Egypt.

<sup>4</sup> Department of Biomedical and Pharmaceutical Sciences, College of Pharmacy, University  
of Rhode Island, Kingston, Rhode Island, USA.

<sup>5</sup> Certara Inc (Simcyp Division), 1 Concourse Way, Sheffield, UK.

\*These authors contributed equally to the manuscript.

†Corresponding author at:

Centre for Applied Pharmacokinetic Research, School of Health Sciences, The University of  
Manchester, Stopford Building, Oxford Road, Manchester, M13 9PT, UK

Email: [Jill.Barber@manchester.ac.uk](mailto:Jill.Barber@manchester.ac.uk)

Phone: +44 (0) 1612752369

**Table S1:** Detailed parameters applied with MaxQuant.

| <b>Group specific Parameters</b>             |                                                             |
|----------------------------------------------|-------------------------------------------------------------|
| <b>1- Type Standard:</b> none                | Multiplicity: 1                                             |
| <b>2- Digestion mode:</b> Specific           | Enzyme: Trypsin/P                                           |
|                                              | Max. missed: 1                                              |
| <b>3- Modifications</b>                      | Variable modifications:<br>Oxidation (M) & Deamidation (NQ) |
|                                              | Max number of modifications per peptide: 11                 |
| <b>4- Instrument</b>                         | Orbitrap                                                    |
| First search peptide tolerance 20            | Main search peptide tolerance 5                             |
| Peptide tolerance unit ppm                   | Individual peptide mass tolerance (Checked)                 |
| Isotope match tolerance 2                    | Isotope match tolerance unit ppm                            |
| Centroid match tolerance 8                   | Centroid match tolerance unit ppm                           |
| Centroid half width 35                       | Centroid half width unit ppm                                |
| Time Valley Factor 1.4                       | Isotope Valley factor 1.2                                   |
| Isotope time correlation 0.6                 | Theoretical isotope correlation 0.6                         |
| Recalibration unit ppm                       | Min Peak length 2                                           |
| Max charge 7                                 | Min score for recalibration 70                              |
| Cut peaks (checked)                          | Gap scans 1                                                 |
| Intensity threshold 0                        | Intensity determination Value at Maximum                    |
| <b>5- Label free quantification:</b> yes     |                                                             |
| <b>Global parameters</b>                     |                                                             |
| <b>1- Sequence</b>                           | include contaminants (checked)                              |
| Fixed modifications Carbamidomethyl (C)      | Min pep length 7                                            |
| Max peptide mass [Da] 4500                   | Min peptide length for unspecific search 8                  |
| Max. peptide length for unspecific search 25 |                                                             |

|                                                   |                                                  |
|---------------------------------------------------|--------------------------------------------------|
| <b>2- Identification</b>                          | PSM FDR 0.01                                     |
| XPSM FDR 0.01                                     | Protein FDR 0.01                                 |
| Site decoy fraction 0.01                          | Min. peptides 1                                  |
| Min.razor + unique peptides 1                     | Min. unique peptides 0                           |
| Min. score for unmodified peptides 0              | Min. score for modified peptides 0               |
| Min. delta score for unmodified peptides 0        | Min. delta score for modified peptides 6         |
| Main search max. combinations 200                 | Base FDR calculations on delta score (unchecked) |
| Razor protein FDR checked                         |                                                  |
| <b>3- Protein Quantification</b>                  | Label min. ratio count 2                         |
| Peptides for quantification Unique + razor        | Use only unmodified peptides                     |
| Modifications used in protein quantification      | Oxidation (M) & Deamidation (NQ)                 |
| Discard unmodified counterpart peptides (checked) | Advanced ratio estimation (checked)              |
| <b>4- Advanced</b>                                | Calculate peak properties (unchecked)            |
| Decoy mode Revert                                 | Use for occupancies Normalized ratios            |
| <b>5- Label free quantification</b>               | Separate LFQ in parameter groups unchecked       |
| Stabilize large LFQ ratios (checked)              | Require MS/MS for LFQ comparisons (checked)      |
| ¡BAQ (unchecked)                                  | Advanced site intensities (checked)              |
| LFQ norm for sites and peptides (unchecked)       | <b>6- MS/MS FTMS</b>                             |
| FTMS MS/MS match tolerance 20                     | FTMS MS/MS match tolerance unit ppm              |
| FTMS MS/MS de novo tolerance 10                   | FTMS MS/MS de novo tolerance unit ppm            |
| FTMS MS/MS deisotoping tolerance 7                | FTMS MS/MS deisotoping tolerance unit ppm        |
| FTMS top peaks per Da interval 12                 | FTMS top x mass window [Da] 100                  |
| FTMS de isotoping (checked)                       | FTMS higher charges (checked)                    |
| FTMS water loss (checked)                         | FTMS ammonia loss (checked)                      |
| FTMS dependent losses (checked)                   | FTMS recalibration (unchecked)                   |

|                                             |                                          |
|---------------------------------------------|------------------------------------------|
| <b>7- MS/MS ITMS</b>                        | ITMS MS/MS match tolerance 0.5           |
| ITMS MS/MS match tolerance unit Da          | ITMS MS/MS de novo tolerance 0.25        |
| ITMS MS/MS de novo tolerance unit Da        | ITMS MS/MS deisotoping tolerance 0.15    |
| ITMS MS/MS deisotoping tolerance unit Da    | ITMS top peaks per Da interval 8         |
| ITMStop x mass window [Da] 100              | ITMS de-isotoping (unchecked)            |
| ITMS higher charges (checked)               | ITMS water loss (checked)                |
| ITMS ammonia loss (checked)                 | ITMS dependent losses checked            |
| ITMS recalibration (unchecked)              | <b>8- MS/MS- TOF</b>                     |
| TOF MS/MS match tolerance 40                | TOF MS/MS match tolerance unit ppm       |
| TOF MS/MS de novo tolerance 0.02            | TOF MS/MS de novo tolerance unit Da      |
| TOF MS/MS deisotoping tolerance 0.01        | TOF MS/MS deisotoping tolerance unit Da  |
| TOF top peaks per Da interval 10            | TOF top x mass window [Da] 100           |
| TOF de isotoping (checked)                  | TOF higher charges (checked)             |
| TOF water loss (checked)                    | TOF ammonia loss (checked)               |
| TOF dependent losses (checked)              | TOF recalibration (unchecked)            |
| <b>9- MS/MS unknown</b>                     | Unknown MS/MS match tolerance 0.5        |
| Unknown MS/MS match tolerance unit Da       | Unknown MS/MS de novo tolerance 0.25     |
| Unknown MS/MS de novo tolerance unit Da     | Unknown MS/MS deisotoping tolerance 0.15 |
| Unknown MS/MS deisotoping tolerance unit Da | Unknown top peaks per Da interval 8      |
| Unknown top x mass window [Da] 100          | Unknown de isotoping (unchecked)         |
| Unknown higher charges (checked)            | Unknown water loss (checked)             |
| Unknown ammonia loss (checked)              | Unknown dependent losses checked         |
| Unknown recalibration (unchecked)           | <b>10- tables</b>                        |
| Write msScans table (checked)               | Write msms Scans table (checked)         |
| Write ms3Scans table (checked)              | Write all Peptides table (checked)       |
| Write mzRange table (checked)               | Write pasefMsms Scans table (checked)    |

|                                                      |  |
|------------------------------------------------------|--|
| Write accumulatedPasef Msms Scans table<br>(checked) |  |
|------------------------------------------------------|--|

**Table S2.** Range of cut-off scores in Progenesis. The cut-off scores for Progenesis are equivalent to a cut-off score of 40 in MaxQuant. The equation represents a mathematical relationship that allows conversion of cut-off scores from one software to the other.

Progenesis score is represented by y and MaxQuant score by x.

| <b>Sample</b> | <b>Equation to convert cut-off scores</b> | <b>R<sup>2</sup></b> | <b>Cut-off score for Progenesis</b> |
|---------------|-------------------------------------------|----------------------|-------------------------------------|
| HLM76         | $y=0.3353x$                               | 0.32                 | 13.4                                |
| HLM02         | $y=0.3445x$                               | 0.34                 | 13.8                                |
| HLM25         | $y=0.3386x$                               | 0.35                 | 13.5                                |
| HLM48         | $y=0.359x$                                | 0.41                 | 14.4                                |
| HLM73         | $y=0.374x$                                | 0.43                 | 15.0                                |
| HLM80         | $y=0.3539x$                               | 0.34                 | 14.2                                |
| HLM91         | $y=0.3617x$                               | 0.35                 | 14.5                                |
| HLM06         | $y=0.3439x$                               | 0.32                 | 13.8                                |
| HLM11         | $y=0.3552x$                               | 0.41                 | 14.2                                |
| HLM38         | $y=0.3673x$                               | 0.40                 | 14.7                                |
| HLM41         | $y=0.3187x$                               | 0.25                 | 12.8                                |
| HLM72         | $y=0.3489x$                               | 0.41                 | 14                                  |
| HLM75         | $y=0.3675x$                               | 0.37                 | 14.7                                |
| HLM90         | $y=0.2964x$                               | 0.30                 | 11.9                                |
| HLM117        | $y=0.3215x$                               | 0.28                 | 12.9                                |
| HLM08         | $y = 0.4129x$                             | 0.23                 | 16.5                                |
| HLM71         | $y = 0.3682x$                             | 0.32                 | 14.7                                |
| HLM77         | $y = 0.3651x$                             | 0.40                 | 14.6                                |
| HLM78         | $y = 0.3371x$                             | 0.31                 | 13.5                                |
| HLM74         | $y = 0.3446x$                             | 0.33                 | 13.8                                |
| HLM100        | $y = 0.3561x$                             | 0.36                 | 14.2                                |
| HLM89         | $y = 0.3643x$                             | 0.43                 | 14.6                                |
| HLM01         | $y = 0.363x$                              | 0.35                 | 14.5                                |

**Table S3.** Regression equation for the relationship between Progenesis intensities (y) and MaxQuant intensities (x) and the coefficient of determination for each individual human liver microsome (HLM) sample.

| <b>Sample</b> | <b>Regression equation to convert intensities</b> | <b>R<sup>2</sup></b> |
|---------------|---------------------------------------------------|----------------------|
| HLM01         | y=0.0248x                                         | 0.68                 |
| HLM02         | y=0.012x                                          | 0.62                 |
| HLM06         | y=0.0123x                                         | 0.59                 |
| HLM08         | y=0.0145x                                         | 0.62                 |
| HLM11         | y=0.0162x                                         | 0.50                 |
| HLM25         | y=0.0146x                                         | 0.60                 |
| HLM38         | y=0.0118x                                         | 0.66                 |
| HLM41         | y=0.01242x                                        | 0.59                 |
| HLM48         | y=0.0144x                                         | 0.59                 |
| HLM71         | y=0.0132x                                         | 0.65                 |
| HLM72         | y=0.0171x                                         | 0.57                 |
| HLM73         | y=0.0151x                                         | 0.59                 |
| HLM74         | y=0.0123x                                         | 0.61                 |
| HLM75         | y=0.0115x                                         | 0.65                 |
| HLM76         | y=0.013x                                          | 0.74                 |
| HLM77         | y=0.0147x                                         | 0.67                 |
| HLM78         | y=0.0131x                                         | 0.56                 |
| HLM80         | y=0.0144x                                         | 0.67                 |
| HLM89         | y=0.0156x                                         | 0.57                 |
| HLM90         | y=0.016x                                          | 0.57                 |
| HLM91         | y=0.025x                                          | 0.63                 |
| HLM100        | y=0.0127x                                         | 0.53                 |
| HLM117        | y=0.0149x                                         | 0.49                 |

**Table S4.** Comparison of the total number of peptides, peptides specific for a software and modified peptides identified by MaxQuant and Progenesis. This comparison was done before removing peptides with scores lower than 40 in MaxQuant or equivalent for Progenesis.

| Sample      | MaxQuant total peptides | Progenesis total peptides | MaxQuant only peptides |            | Progenesis only peptides |            | Overlap      |            | MaxQuant modified |           | Progenesis modified |            |
|-------------|-------------------------|---------------------------|------------------------|------------|--------------------------|------------|--------------|------------|-------------------|-----------|---------------------|------------|
|             |                         |                           | Number                 | Percent    | Number                   | Percent    | Number       | Percent    | Number            | Percent   | Number              | Percent    |
| HLM01       | 16366                   | 20284                     | 3280                   | 14%        | 7198                     | 31%        | 13086        | 56%        | 714               | 4%        | 5053                | 25%        |
| HLM02       | 20584                   | 19950                     | 7485                   | 27%        | 6851                     | 25%        | 13099        | 48%        | 1259              | 6%        | 4919                | 24%        |
| HLM06       | 18725                   | 19236                     | 6531                   | 25%        | 7042                     | 27%        | 12194        | 47%        | 937               | 5%        | 4784                | 25%        |
| HLM08       | 18169                   | 22645                     | 3934                   | 15%        | 8410                     | 32%        | 14235        | 54%        | 872               | 5%        | 5801                | 26%        |
| HLM11       | 17912                   | 21733                     | 4351                   | 17%        | 8172                     | 31%        | 13561        | 52%        | 946               | 5%        | 5534                | 26%        |
| HLM25       | 18773                   | 20558                     | 5475                   | 21%        | 7260                     | 28%        | 13298        | 51%        | 1037              | 6%        | 5130                | 25%        |
| HLM38       | 17909                   | 22449                     | 4212                   | 16%        | 8752                     | 33%        | 13697        | 51%        | 929               | 5%        | 5841                | 26%        |
| HLM41       | 17789                   | 21019                     | 4580                   | 18%        | 7810                     | 31%        | 13209        | 52%        | 1470              | 8%        | 5656                | 27%        |
| HLM48       | 17743                   | 20701                     | 4388                   | 17%        | 7346                     | 29%        | 13355        | 53%        | 917               | 6%        | 5258                | 25%        |
| HLM71       | 16413                   | 21986                     | 2772                   | 11%        | 8345                     | 34%        | 13641        | 55%        | 847               | 5%        | 5990                | 27%        |
| HLM72       | 17269                   | 21027                     | 4028                   | 16%        | 7786                     | 31%        | 13241        | 53%        | 936               | 5%        | 5305                | 25%        |
| HLM73       | 17393                   | 20847                     | 3946                   | 16%        | 7400                     | 30%        | 13447        | 54%        | 3236              | 19%       | 7199                | 35%        |
| HLM74       | 18170                   | 19150                     | 5741                   | 23%        | 6721                     | 27%        | 12429        | 50%        | 879               | 5%        | 4728                | 25%        |
| HLM75       | 16809                   | 20901                     | 3957                   | 16%        | 8049                     | 32%        | 12852        | 52%        | 842               | 5%        | 5487                | 26%        |
| HLM76       | 19091                   | 19107                     | 6554                   | 26%        | 6570                     | 26%        | 12537        | 49%        | 1103              | 6%        | 4673                | 24%        |
| HLM77       | 17348                   | 20466                     | 3916                   | 16%        | 7034                     | 29%        | 13432        | 55%        | 1014              | 6%        | 5115                | 25%        |
| HLM78       | 18794                   | 18989                     | 6467                   | 25%        | 6662                     | 26%        | 12327        | 48%        | 1113              | 6%        | 4790                | 25%        |
| HLM80       | 17326                   | 20734                     | 4113                   | 17%        | 7521                     | 30%        | 13213        | 53%        | 839               | 5%        | 5366                | 26%        |
| HLM89       | 17801                   | 22059                     | 3853                   | 15%        | 8111                     | 31%        | 13948        | 54%        | 1603              | 9%        | 6258                | 28%        |
| HLM90       | 17497                   | 21586                     | 4142                   | 16%        | 8231                     | 32%        | 13355        | 52%        | 1030              | 6%        | 5693                | 26%        |
| HLM91       | 17149                   | 20650                     | 4061                   | 16%        | 7562                     | 31%        | 13088        | 53%        | 836               | 5%        | 5224                | 25%        |
| HLM100      | 18207                   | 21220                     | 4477                   | 17%        | 7490                     | 29%        | 13730        | 53%        | 988               | 5%        | 5242                | 25%        |
| HLM117      | 19923                   | 19628                     | 7491                   | 28%        | 7196                     | 27%        | 12432        | 46%        | 1031              | 5%        | 4886                | 25%        |
| <b>Mean</b> | <b>17963</b>            | <b>20736</b>              | <b>4772</b>            | <b>19%</b> | <b>7544</b>              | <b>30%</b> | <b>13192</b> | <b>52%</b> | <b>1103</b>       | <b>6%</b> | <b>5388</b>         | <b>26%</b> |
| <b>SD</b>   | 1021                    | 1059                      | 1311                   | 5%         | 611                      | 2%         | 531          | 3%         | 508               | 3%        | 581                 | 2%         |
| <b>CV</b>   | 6%                      | 5%                        | 27%                    | 25%        | 8%                       | 8%         | 4%           | 5%         | 46%               | 47%       | 11%                 | 8%         |



**Table S5.** Statistical comparison between peptide characteristics for sample HLM76 in relation to peptide length, GRAVY score (hydrophobicity), isoelectric point (PI), and molecular weight of peptides detected by only one software tool MaxQuant (*Max.*) and Progenesis (*Pro.*).

|                                  | <i>Length</i> |             | <i>GRAVY score</i> |             | <i>PI</i>   |             | <i>Molecular weight</i> |             |
|----------------------------------|---------------|-------------|--------------------|-------------|-------------|-------------|-------------------------|-------------|
|                                  | <i>Max.</i>   | <i>Pro.</i> | <i>Max.</i>        | <i>Pro.</i> | <i>Max.</i> | <i>Pro.</i> | <i>Max.</i>             | <i>Pro.</i> |
| <b>Median</b>                    | 13            | 13          | -0.1667            | -0.4692     | 5.848       | 6.613       | 1530.69                 | 1450.72     |
| <b>Mode</b>                      | 11            | 7           | -0.1               | -0.3        | 9.831       | 9.831       | 1264.4                  | 785.939     |
| <b>n</b>                         | 6447          | 2157        | 6447               | 2157        | 6447        | 2157        | 6447                    | 2157        |
| <b>Mann-Whitney test P value</b> | <0.0001       |             | <0.001             |             | <0.001      |             | <0.001                  |             |

**Table S6.** Enzyme and transporter proteins detected in 23 human liver samples by the two software tools.

| Gene name   | Number of samples where unique/distinct peptides are identified |               |      |         |
|-------------|-----------------------------------------------------------------|---------------|------|---------|
|             | Progenesis only                                                 | MaxQuant only | Both | Neither |
| <b>CYPs</b> |                                                                 |               |      |         |
| CYP1A1      | 5                                                               | 0             | 2    | 16      |
| CYP1A2      | 0                                                               | 0             | 23   | 0       |
| CYP17A1     | 0                                                               | 0             | 1    | 22      |
| CYP20A1     | 0                                                               | 0             | 0    | 23      |
| CYP26A1     | 1                                                               | 3             | 1    | 18      |
| CYP27A1     | 0                                                               | 0             | 23   | 0       |
| CYP39A1     | 0                                                               | 6             | 13   | 4       |
| CYP51A1     | 0                                                               | 0             | 23   | 0       |
| CYP3A4      | 0                                                               | 0             | 23   | 0       |
| CYP3A5      | 0                                                               | 0             | 23   | 0       |
| CYP2A6      | 0                                                               | 0             | 23   | 0       |
| CYP2A7      | 13                                                              | 0             | 5    | 5       |
| CYP3A7      | 3                                                               | 0             | 14   | 6       |
| CYP4A11     | 0                                                               | 0             | 23   | 0       |
| CYP2A13     | 1                                                               | 0             | 0    | 22      |
| CYP4A22     | 1                                                               | 0             | 0    | 22      |
| CYP1B1      | 0                                                               | 0             | 2    | 21      |
| CYP7B1      | 0                                                               | 0             | 23   | 0       |
| CYP8B1      | 0                                                               | 0             | 23   | 0       |
| CYP2B6      | 0                                                               | 0             | 23   | 0       |
| CYP2C8      | 0                                                               | 0             | 23   | 0       |

|             |    |    |    |    |
|-------------|----|----|----|----|
| CYP2C9      | 0  | 0  | 23 | 0  |
| CYP2C18     | 0  | 2  | 20 | 1  |
| CYP2C19     | 0  | 1  | 17 | 5  |
| CYP2D6      | 0  | 0  | 23 | 0  |
| CYP2E1      | 0  | 0  | 23 | 0  |
| CYP2F1      | 22 | 0  | 0  | 1  |
| CYP4F2      | 0  | 0  | 23 | 0  |
| CYP4F3      | 0  | 2  | 21 | 0  |
| CYP4F8      | 0  | 12 | 11 | 0  |
| CYP4F11     | 0  | 0  | 23 | 0  |
| CYP4F12     | 0  | 1  | 17 | 5  |
| CYP4F22     | 6  | 5  | 10 | 2  |
| CYP2J2      | 1  | 5  | 16 | 1  |
| CYP2S1      | 2  | 7  | 8  | 6  |
| CYP4V2      | 0  | 1  | 22 | 0  |
| <b>UGTs</b> |    |    |    |    |
| UGT1A1      | 0  | 0  | 23 | 0  |
| UGT2A1      | 0  | 2  | 20 | 1  |
| UGT3A1      | 1  | 3  | 2  | 17 |
| UGT1A3      | 0  | 0  | 23 | 0  |
| UGT2A3      | 0  | 0  | 23 | 0  |
| UGT1A4      | 0  | 0  | 23 | 0  |
| UGT1A5      | 1  | 1  | 0  | 21 |
| UGT1A6      | 0  | 0  | 23 | 0  |
| UGT1A9      | 0  | 0  | 23 | 0  |
| UGT2B4      | 0  | 0  | 23 | 0  |

|                         |   |    |    |    |
|-------------------------|---|----|----|----|
| UGT2B7                  | 0 | 0  | 23 | 0  |
| UGT2B10                 | 0 | 0  | 23 | 0  |
| UGT2B11                 | 1 | 3  | 0  | 19 |
| UGT2B15                 | 0 | 0  | 23 | 0  |
| UGT2B17                 | 0 | 2  | 17 | 4  |
| <b>SLC transporters</b> |   |    |    |    |
| SLC1A1                  | 1 | 11 | 7  | 4  |
| SLC2A1                  | 6 | 1  | 4  | 12 |
| SLC16A1                 | 0 | 0  | 23 | 0  |
| SLC22A1                 | 0 | 1  | 22 | 0  |
| SLC23A1                 | 0 | 3  | 0  | 20 |
| SLC26A1                 | 0 | 6  | 7  | 10 |
| SLC27A1                 | 2 | 3  | 16 | 2  |
| SLC28A1                 | 0 | 1  | 0  | 22 |
| SLC29A1                 | 0 | 5  | 12 | 6  |
| SLC30A1                 | 0 | 8  | 9  | 6  |
| SLC33A1                 | 0 | 0  | 23 | 0  |
| SLC40A1                 | 0 | 6  | 3  | 14 |
| SLC43A1                 | 0 | 5  | 10 | 8  |
| SLC44A1                 | 0 | 5  | 18 | 0  |
| SLC48A1                 | 0 | 1  | 0  | 22 |
| SLC1A2                  | 0 | 5  | 1  | 17 |
| SLC2A2                  | 0 | 0  | 23 | 0  |
| SLC7A2                  | 0 | 3  | 18 | 2  |
| SLC16A2                 | 0 | 1  | 18 | 4  |
| SLC20A2                 | 0 | 3  | 0  | 20 |

|         |   |    |    |    |
|---------|---|----|----|----|
| SLC23A2 | 1 | 0  | 0  | 22 |
| SLC25A2 | 1 | 0  | 0  | 22 |
| SLC38A2 | 0 | 2  | 7  | 14 |
| SLC43A2 | 5 | 0  | 0  | 18 |
| SLC44A2 | 0 | 4  | 1  | 18 |
| SLC1A3  | 1 | 11 | 2  | 9  |
| SLC2A3  | 6 | 1  | 2  | 14 |
| SLC7A3  | 0 | 1  | 0  | 22 |
| SLC16A3 | 0 | 0  | 1  | 22 |
| SLC19A3 | 0 | 9  | 8  | 6  |
| SLC22A3 | 0 | 1  | 0  | 22 |
| SLC29A3 | 7 | 1  | 4  | 11 |
| SLC35A3 | 1 | 1  | 13 | 8  |
| SLC38A3 | 0 | 1  | 22 | 0  |
| SLC41A3 | 3 | 0  | 0  | 20 |
| SLC43A3 | 0 | 0  | 23 | 0  |
| SLC46A3 | 0 | 1  | 1  | 21 |
| SLC1A4  | 0 | 3  | 13 | 7  |
| SLC38A4 | 0 | 0  | 23 | 0  |
| SLC7A5  | 0 | 0  | 1  | 22 |
| SLC5A6  | 0 | 5  | 4  | 14 |
| SLC16A7 | 0 | 4  | 2  | 17 |
| SLC22A7 | 0 | 6  | 14 | 3  |
| SLC26A7 | 0 | 2  | 0  | 21 |
| SLC30A7 | 0 | 2  | 20 | 0  |
| SLC38A7 | 0 | 1  | 0  | 22 |

|          |   |    |    |    |
|----------|---|----|----|----|
| SLC39A7  | 0 | 0  | 23 | 0  |
| SLC7A8   | 4 | 1  | 2  | 16 |
| SLC2A9   | 0 | 2  | 0  | 21 |
| SLC22A9  | 0 | 4  | 16 | 3  |
| SLC30A9  | 1 | 2  | 1  | 19 |
| SLC39A9  | 0 | 4  | 18 | 1  |
| SLC2A10  | 6 | 4  | 5  | 8  |
| SLC38A10 | 0 | 13 | 9  | 1  |
| SLC39A11 | 2 | 1  | 19 | 1  |
| SLC2A12  | 2 | 0  | 0  | 21 |
| SLC6A12  | 0 | 3  | 6  | 14 |
| SLC16A12 | 0 | 2  | 0  | 21 |
| SLC2A13  | 0 | 0  | 1  | 22 |
| SLC39A14 | 0 | 0  | 23 | 0  |
| SLC25A15 | 0 | 0  | 23 | 0  |
| SLC22A18 | 0 | 0  | 23 | 0  |
| SLC25A40 | 1 | 4  | 0  | 18 |
| SLC25A42 | 0 | 0  | 23 | 0  |
| SLC25A44 | 0 | 4  | 0  | 19 |
| SLC25A46 | 0 | 15 | 2  | 6  |
| SLC35B1  | 0 | 2  | 12 | 9  |
| SLC35B2  | 0 | 3  | 4  | 16 |
| SLC35C1  | 0 | 0  | 4  | 19 |
| SLC35C2  | 0 | 1  | 0  | 22 |
| SLC35D1  | 0 | 1  | 21 | 1  |
| SLC35F6  | 0 | 3  | 18 | 2  |

|                         |   |    |    |    |
|-------------------------|---|----|----|----|
| SLCO1B1                 | 0 | 0  | 23 | 0  |
| SLCO1B3                 | 0 | 0  | 23 | 0  |
| SLCO2B1                 | 0 | 2  | 20 | 1  |
| <b>ABC transporters</b> |   |    |    |    |
| ABCA1                   | 0 | 6  | 16 | 1  |
| ABCA2                   | 1 | 13 | 3  | 6  |
| ABCA6                   | 0 | 0  | 23 | 0  |
| ABCA8                   | 0 | 3  | 14 | 6  |
| ABCA10                  | 1 | 0  | 0  | 22 |
| ABCA13                  | 1 | 0  | 0  | 22 |
| ABCB1 (MDR1)            | 0 | 2  | 21 | 0  |
| ABCB4 (MDR3)            | 0 | 3  | 3  | 17 |
| ABCB5                   | 4 | 2  | 0  | 17 |
| ABCB6                   | 0 | 4  | 17 | 2  |
| ABCB7                   | 0 | 1  | 22 | 0  |
| ABCB8                   | 0 | 0  | 23 | 0  |
| ABCB10                  | 0 | 0  | 23 | 0  |
| ABCB11                  | 0 | 2  | 21 | 0  |
| ABCC1 (MRP1)            | 0 | 2  | 0  | 21 |
| ABCC2 (MRP2)            | 0 | 9  | 12 | 2  |
| ABCC3 (MRP3)            | 0 | 3  | 19 | 1  |
| ABCC5 (MRP5)            | 1 | 0  | 0  | 22 |
| ABCC6 (MRP6)            | 0 | 0  | 23 | 0  |
| ABCD1                   | 0 | 0  | 23 | 0  |
| ABCD2                   | 1 | 0  | 0  | 22 |
| ABCD3                   | 0 | 0  | 23 | 0  |

|       |   |   |    |    |
|-------|---|---|----|----|
| ABCD4 | 0 | 7 | 16 | 0  |
| ABCE1 | 1 | 3 | 0  | 19 |
| ABCG8 | 1 | 1 | 1  | 20 |



**Table S7.** Median and mode scores for software-specific peptides in each sample.

| <b>Sample</b> | <b>MaxQuant</b>     |                   | <b>Progenesis</b>                         |                                         |
|---------------|---------------------|-------------------|-------------------------------------------|-----------------------------------------|
|               | <b>Median score</b> | <b>Mode score</b> | <b>Median score (MaxQuant Equivalent)</b> | <b>Mode score (MaxQuant Equivalent)</b> |
| HLM01         | 78.2                | 64.3              | 32.4 (89.3)                               | 15.5 (42.6)                             |
| HLM02         | 123                 | 114.9             | 51.4 (149)                                | 88.6 (257.2)                            |
| HLM06         | 126.9               | 94.7              | 53.1 (154.2)                              | 56.3 (163.7)                            |
| HLM08         | 74.6                | 60.5              | 23.9 (57.9)                               | 17.7 (42.9)                             |
| HLM11         | 124.7               | 114.5             | 51.9 (146.1)                              | 30.5 (85.9)                             |
| HLM25         | 92.8                | 91.6              | 30.6 (90.5)                               | 17.5 (51.7)                             |
| HLM38         | 122.8               | 108.9             | 51.9 (141.4)                              | 58.5 (159.2)                            |
| HLM41         | 123.7               | 101.6             | 49.8 (156.1)                              | 61.9 (197.2)                            |
| HLM48         | 199.7               | 252.4             | 29.8 (83.1)                               | 17.5 (48.7)                             |
| HLM71         | 79.6                | 58.4              | 31.7 (86.2)                               | 14.9 (40.4)                             |
| HLM72         | 128.4               | 114.5             | 52.9 (151.6)                              | 37.3 (106.9)                            |
| HLM73         | 77.7                | 50                | 32.3 (86.3)                               | 18.6 (49.8)                             |
| HLM74         | 96.1                | 58.9              | 29.6 (85.9)                               | 14.4 (41.8)                             |
| HLM75         | 122.6               | 122.1             | 52.5 (142.9)                              | 35.3 (96.1)                             |
| HLM76         | 98.7                | 367.2             | 29.5 (87.9)                               | 13.6 (40.4)                             |
| HLM77         | 79.2                | 46.5              | 34.5 (86.3)                               | 16.2 (40.6)                             |
| HLM78         | 97.3                | 125.9             | 29.5 (87.5)                               | 13.6 (40.5)                             |
| HLM80         | 87.4                | 47.6              | 29.8 (84.2)                               | 15.3 (43.2)                             |
| HLM89         | 77.6                | 47.2              | 30.4 (83.5)                               | 15.7 (42.9)                             |
| HLM90         | 123.1               | 108.9             | 45.5 (153.4)                              | 23.2 (78.3)                             |
| HLM91         | 86.8                | 110.4             | 32.4 (89.6)                               | 20.1 (55.5)                             |
| HLM100        | 86.1                | 62.5              | 32.2 (90.4)                               | 14.9 (41.7)                             |
| HLM117        | 133.1               | 114.9             | 52.9 (164.7)                              | 31.5 (98.1)                             |

**Table S8.** Median and mode Gravy scores for software-specific peptides in each sample.

| <b>Sample</b> | <b>MaxQuant</b>           |                         | <b>Progenesis</b>         |                         |
|---------------|---------------------------|-------------------------|---------------------------|-------------------------|
|               | <b>Median Gravy score</b> | <b>Mode Gravy score</b> | <b>Median Gravy score</b> | <b>Mode Gravy score</b> |
| HLM01         | -0.20                     | -0.30                   | -0.49                     | -0.50                   |
| HLM02         | -0.13                     | 0.30                    | -0.52                     | -0.70                   |
| HLM06         | -0.16                     | -0.30                   | -0.48                     | 0.10                    |
| HLM08         | -0.12                     | 0.30                    | -0.49                     | -0.40                   |
| HLM11         | 0.09                      | 0.20                    | -0.51                     | -0.70                   |
| HLM25         | -0.14                     | -0.10                   | -0.51                     | -0.50                   |
| HLM38         | -0.17                     | -0.40                   | -0.48                     | -0.52                   |
| HLM41         | -0.35                     | -0.30                   | -0.50                     | -0.50                   |
| HLM48         | -0.13                     | 0.30                    | -0.52                     | -0.70                   |
| HLM71         | -0.28                     | -0.70                   | -0.47                     | -0.50                   |
| HLM72         | -0.14                     | -0.60                   | -0.48                     | -0.90                   |
| HLM73         | -0.09                     | 0.40                    | -0.47                     | -0.70                   |
| HLM74         | -0.19                     | -0.20                   | -0.51                     | -0.50                   |
| HLM75         | -0.21                     | -0.20                   | -0.43                     | -0.70                   |
| HLM76         | -0.17                     | -0.10                   | -0.47                     | -0.30                   |
| HLM77         | -0.14                     | 0.10                    | -0.44                     | 0.10                    |
| HLM78         | -0.20                     | -0.20                   | -0.46                     | -0.30                   |
| HLM80         | -0.20                     | -0.10                   | -0.50                     | -0.70                   |
| HLM89         | -0.14                     | 0.30                    | -0.47                     | -0.70                   |
| HLM90         | -0.09                     | -0.1                    | -0.53                     | -0.50                   |
| HLM91         | -0.20                     | -0.20                   | -0.43                     | -0.70                   |
| HLM100        | -0.17                     | -0.10                   | -0.50                     | -0.70                   |
| HLM117        | -0.16                     | -0.30                   | -0.47                     | -0.20                   |

**Table S9.** Abundance of ABC transporters using MaxQuant and Progenesis. The abundance values have been quantified using the total protein approach and are expressed as parts per million (PPM).

| <b>ABC transporter (UniProt Accession)</b> | <b>Abundance in Progenesis (PPM)</b> | <b>Abundance in MaxQuant</b> |
|--------------------------------------------|--------------------------------------|------------------------------|
| ABCA1_HUMAN                                | 43                                   | 11                           |
| ABCA2_HUMAN                                | 38                                   | 7                            |
| ABCA6_HUMAN                                | 109                                  | 112                          |
| ABCA8_HUMAN                                | 80                                   | 11                           |
| ABCBA_HUMAN                                | 14                                   | 23                           |
| ABCB5_HUMAN                                | 11                                   | 5                            |
| ABCB6_HUMAN                                | 22                                   | 13                           |
| ABCB7_HUMAN                                | 21                                   | 38                           |
| ABCB8_HUMAN                                | 18                                   | 28                           |
| ABCD1_HUMAN                                | 17                                   | 14                           |
| ABCD2_HUMAN                                | 55                                   | 4                            |
| ABCD4_HUMAN                                | 222                                  | 5                            |
| ABCE1_HUMAN                                | 5                                    | 1                            |
| ABCG8_HUMAN                                | 13                                   | 3                            |
| ABCBB_HUMAN                                | 35                                   | 32                           |
| MRP2_HUMAN                                 | 11                                   | 9                            |
| MDR1_HUMAN                                 | 41                                   | 42                           |
| MRP5_HUMAN                                 | 5                                    | 5                            |
| MRP6_HUMAN                                 | 40                                   | 41                           |
| MDR3_HUMAN                                 | 25                                   | 19                           |
| ABCD3_HUMAN                                | 1217                                 | 842                          |
| MRP3_HUMAN                                 | 2520                                 | 15                           |
